# Supplementary material for: Electrical synaptic transmission requires a postsynaptic scaffolding protein
Source: eLife. 2021 Apr 28;10:e66898. doi: 10.7554/eLife.66898 (PMC8081524; doi:10.7554/eLife.66898)
Supplement: Figure 1—figure supplement 1—source data 1. [file elife-66898-fig1-figsupp1-data1.xlsx]

## Sheet: Fig1-figsupp1
	Hindbrain Club Endings
Fig.S1M		RAW CE count based on designated stain																						NORMALIZED CE count based on designated stain
		wt	tjp1b Δ16bp / Δ16bp			tjp1a Δ2bp / Δ2bp			gjd2a Δ5bp / Δ5bp				gjd1a Δ8bp / Δ8bp			gjd2b Δ1bp / Δ1bp			gjd1b Δ8bp / Δ8bp					wt	tjp1b Δ16bp / Δ16bp			tjp1a Δ2bp / Δ2bp			gjd2a Δ5bp / Δ5bp				gjd1a Δ8bp / Δ8bp			gjd2b Δ1bp / Δ1bp			gjd1b Δ8bp / Δ8bp
		Combined ABs	Cx35/6	Cx34.1	ZO1	Cx35/6	Cx34.1	ZO1	Cx35/6	Cx34.1	ZO1	Cx35.5	Cx35/6	Cx34.1	ZO1	Cx35/6	Cx34.1	ZO1	Cx35/6	Cx34.1	ZO1			Combined ABs	Cx35/6	Cx34.1	ZO1	Cx35/6	Cx34.1	ZO1	Cx35/6	Cx34.1	ZO1	Cx35.5	Cx35/6	Cx34.1	ZO1	Cx35/6	Cx34.1	ZO1	Cx35/6	Cx34.1	ZO1
	num. for animal	9	6	10	8	13	11	12	9	13	10	0	12	0	14	17	13	15	15	14	13		num. for animal	0.756708	0.504472	0.840787	0.67263	1.09302	0.924866	1.00894	0.756708	1.09302	0.840787	0	1.00894	0	1.1771	1.42934	1.09302	1.26118	1.26118	1.1771	1.09302
		10	7	7	8	12	12	11	8	9	15	0	13	0	11	13	13	12	17	14	14			0.840787	0.588551	0.588551	0.67263	1.00894	1.00894	0.924866	0.67263	0.756708	1.26118	0	1.09302	0	0.924866	1.09302	1.09302	1.00894	1.42934	1.1771	1.1771
		15	9	8	9	16	13	13	8	11	14	0	12	0	14	17	11	17	16	13	16			1.26118	0.756708	0.67263	0.756708	1.34526	1.09302	1.09302	0.67263	0.924866	1.1771	0	1.00894	0	1.1771	1.42934	0.924866	1.42934	1.34526	1.09302	1.34526
		13	7	5	8	13	11	10	7	11	10	0	14	0	14	16	13	20	13	13	14			1.09302	0.588551	0.420394	0.67263	1.09302	0.924866	0.840787	0.588551	0.924866	0.840787	0	1.1771	0	1.1771	1.34526	1.09302	1.68157	1.09302	1.09302	1.1771
		13	7	5	9	10	11	11	8	10	12	0	15	0	10	17	13	20	13	11	15			1.09302	0.588551	0.420394	0.756708	0.840787	0.924866	0.924866	0.67263	0.840787	1.00894	0	1.26118	0	0.840787	1.42934	1.09302	1.68157	1.09302	0.924866	1.26118
		14	7	5	7	13	14	10	6	8	12	0	10	0	11	15	12	10	15	14	16			1.1771	0.588551	0.420394	0.588551	1.09302	1.1771	0.840787	0.504472	0.67263	1.00894	0	0.840787	0	0.924866	1.26118	1.00894	0.840787	1.26118	1.1771	1.34526
		9	6	4	6	12	12		7	7	11	0	12	0	13	13	13	13	13	11	15			0.756708	0.504472	0.336315	0.504472	1.00894	1.00894		0.588551	0.588551	0.924866	0	1.00894	0	1.09302	1.09302	1.09302	1.09302	1.09302	0.924866	1.26118
		13	6	6	9	11	9		7	14	11	0	12	0	13	13	13	16	16	10	12			1.09302	0.504472	0.504472	0.756708	0.924866	0.756708		0.588551	1.1771	0.924866	0	1.00894	0	1.09302	1.09302	1.09302	1.34526	1.34526	0.840787	1.00894
		12	7	4	7	9			12	10	11	0	13	0	9	11	11	13	18	12	13			1.00894	0.588551	0.336315	0.588551	0.756708			1.00894	0.840787	0.924866	0	1.09302	0	0.756708	0.924866	0.924866	1.09302	1.51342	1.00894	1.09302
		12	6	5	6				8	8	14	0	12	0	11	12	14	15	11	11	11			1.00894	0.504472	0.420394	0.504472				0.67263	0.67263	1.1771	0	1.00894	0	0.924866	1.00894	1.1771	1.26118	0.924866	0.924866	0.924866
		12	8	8	7				10	9	12	0	12	0	12	12	13	14	19	12	11			1.00894	0.67263	0.67263	0.588551				0.840787	0.756708	1.00894	0	1.00894	0	1.00894	1.00894	1.09302	1.1771	1.5975	1.00894	0.924866
		14	7	5	10				6	14	12	0	10	0	11	12	9	15	16	13	13			1.1771	0.588551	0.420394	0.840787				0.504472	1.1771	1.00894	0	0.840787	0	0.924866	1.00894	0.756708	1.26118	1.34526	1.09302	1.09302
		13	7	6	6				2	11	13	0	11		11	14	13	16	16	14	13			1.09302	0.588551	0.504472	0.504472				0.168157	0.924866	1.09302	0	0.924866		0.924866	1.1771	1.09302	1.34526	1.34526	1.1771	1.09302
		12	7	7	7				3	10	9	0	13		10	14	13	12	14	10	17			1.00894	0.588551	0.588551	0.588551				0.252236	0.840787	0.756708	0	1.09302		0.840787	1.1771	1.09302	1.00894	1.1771	0.840787	1.42934
		13	8	7	9				6	11	9	0	13			18	11	11	15	11	14			1.09302	0.67263	0.588551	0.756708				0.504472	0.924866	0.756708	0	1.09302			1.51342	0.924866	0.924866	1.26118	0.924866	1.1771
		11	9	6					0	10		0	10			13	13	13	12	11	12			0.924866	0.756708	0.504472					0	0.840787		0	0.840787			1.09302	1.09302	1.09302	1.00894	0.924866	1.00894
		14	8	4					1	9		0				12	11	15	14	12	16			1.1771	0.67263	0.336315					0.0840787	0.756708		0				1.00894	0.924866	1.26118	1.1771	1.00894	1.34526
		10	11	5					9			0				13	15		13	15	12			0.840787	0.924866	0.420394					0.756708			0				1.09302	1.26118		1.09302	1.26118	1.00894
		9	10	6					5								15		14		15			0.756708	0.840787	0.504472					0.420394								1.26118		1.1771		1.26118
		10	8	4					7										14		17			0.840787	0.67263	0.336315					0.588551										1.1771		1.42934
		10	9	7					5										16		15			0.840787	0.756708	0.588551					0.420394										1.34526		1.26118
		14		7					4										19		14			1.1771		0.588551					0.336315										1.5975		1.1771
		8		5					2										15		15			0.67263		0.420394					0.168157										1.26118		1.26118
		14		3					4										15		16			1.1771		0.252236					0.336315										1.26118		1.34526
		13		6					7										13		13			1.09302		0.504472					0.588551										1.09302		1.09302
		13		7					3										14		14			1.09302		0.588551					0.252236										1.1771		1.1771
		13							4										15		15			1.09302							0.336315										1.26118		1.26118
		15							6										13		12			1.26118							0.504472										1.09302		1.00894
		10							5										14		15			0.840787							0.420394										1.1771		1.26118
		9																			12			0.756708																			1.00894
		13																			13			1.09302																			1.09302
		13																						1.09302
		14																						1.1771
		14																						1.1771
		11																						0.924866
		12																						1.00894
		10																						0.840787
		11																						0.924866
		12																						1.00894
		10																						0.840787
		12																						1.00894
		9																						0.756708
		12																						1.00894
		12																						1.00894
		12																						1.00894
		14																						1.1771
		11																						0.924866
	avg.	11.8936	7.61905	5.84615	7.73333	12.1111	11.625	11.1667	5.82759	10.2941	11.6667	0	12.125	0	11.7143	14	12.5789	14.5294	14.7586	12.2778	13.9677		avg.	1	0.6406	0.491537	0.650209	1.01829	0.977415	0.938879	0.489976	0.865516	0.980918	0	1.01945	0	0.984922	1.1771	1.05762	1.22161	1.24089	1.0323	1.17439
	stdev	1.82058	1.35927	1.56697	1.27988	2.02759	1.50594	1.16905	2.77835	1.99263	1.79947	0	1.40831	0	1.63747	2.14202	1.46499	2.78652	1.92085	1.52646	1.68293		stdev	0.153072	0.114286	0.131749	0.107611	0.170477	0.126618	0.0982918	0.2336	0.167538	0.151297	0	0.118409	0	0.137677	0.180098	0.123175	0.234287	0.161502	0.128342	0.141499
	sterr	0.265559	0.296617	0.307307	0.330464	0.675863	0.53243	0.477261	0.515926	0.483285	0.464621	0	0.352077	0	0.437633	0.504878	0.336092	0.675831	0.356692	0.359789	0.302263		sterr	0.0223279	0.0249392	0.025838	0.027785	0.0568256	0.0447661	0.0401275	0.0433784	0.0406339	0.0390648	0	0.0296022	0	0.0367956	0.0424495	0.0282582	0.056823	0.0299902	0.0302506	0.0254139
	n	47	21	26	15	9	8	6	29	17	15	18	16	12	14	18	19	17	29	18	31		n	47	21	26	15	9	8	6	29	17	15	18	16	12	14	18	19	17	29	18	31
