# Supplementary material for: Electrical synaptic transmission requires a postsynaptic scaffolding protein
Source: eLife. 2021 Apr 28;10:e66898. doi: 10.7554/eLife.66898 (PMC8081524; doi:10.7554/eLife.66898)
Supplement: Figure 1—source data 1. [file elife-66898-fig1-data1.xlsx]

## Sheet: Fig1
	Hindbrain Club Endings												Spinal cord M/CoLo
									Unpaired t test with Welch's correction - wt to mut												Unpaired t test with Welch's correction - wt to mut
Fig.1M	Cx35.5 Pixel Intensity								P value	0.0002		Fig.1N	Cx35.5 Pixel Intensity								P value	<0.0001
	tjp1b 16bp (fh448)								P value summary	***			tjp1b 16bp (fh448)								P value summary	****
		RAW pixel values				NORMALIZED to wt avg.			Are means signif. different? (P < 0.05)	Yes				RAW pixel values				NORMALIZED to wt avg.			Are means signif. different? (P < 0.05)	Yes
		wt	tjp1b Δ16bp / Δ16bp			wt	tjp1b Δ16bp / Δ16bp		One- or two-tailed P value?	Two-tailed				wt	tjp1b Δ16bp / Δ16bp			wt	tjp1b Δ16bp / Δ16bp		One- or two-tailed P value?	Two-tailed
	avg. for animal	822.256	0		avg. for animal	0.7369	0		Welch-corrected t, df	t=13.30, df=4.000			avg. for animal	102.29	11.593		avg. for animal	1.00463	0.11386		Welch-corrected t, df	t=54.09, df=5.338
		1234.64	0			1.10648	0							102.722	6.7371			1.00888	0.0661678
		1288.53	0			1.15477	0		How big is the difference?					100.443	7.8017			0.986492	0.0766237		How big is the difference?
		1033.29	0			0.926026	0		Mean ± SEM of column A	1.002					6.4311				0.0631625		Mean ± SEM of column A	1
		1200.44	0			1.07583	0		Mean ± SEM of column B	0					14.435				0.141772		Mean ± SEM of column B	0.09232
			0				0		Difference between means	-1.002 ± 0.07533											Difference between means	-0.9077 ± 0.01678
			0				0		95% confidence interval	-1.211 to -0.7929											95% confidence interval	-0.9500 to -0.8654
									R square	0.9779											R square	0.9982
									F test to compare variances												F test to compare variances
	avg.	1115.83	0		avg.	1	0		F,DFn, Dfd	Infinity, 4, 6			avg.	101.818	9.39958		avg.	1	0.0923172		F,DFn, Dfd	8.290, 4, 2
	stdev	189.802	0		stdev	0.170099	0		P value	<0.0001			stdev	1.2105	3.48642		stdev	0.0118888	0.0342416		P value	0.2211
	sterr	84.8819	0		sterr	0.0760706	0		P value summary	****			sterr	0.698883	1.55917		sterr	0.00686402	0.0153133		P value summary	ns
	n	5	7		n	5	7		Are variances significantly different?	Yes			n	3	5		n	3	5		Are variances significantly different?	No
									Unpaired t test with Welch's correction - wt to mut												Unpaired t test with Welch's correction - wt to mut
Fig.1M	Cx34.1 Pixel Intensity								P value	<0.0001		Fig.1N	Cx34.1 Pixel Intensity								P value	0.0011
	tjp1b 16bp (fh448)								P value summary	****			tjp1b 16bp (fh448)								P value summary	**
		RAW pixel values				NORMALIZED to wt avg.			Are means signif. different? (P < 0.05)	Yes				RAW pixel values				NORMALIZED to wt avg.			Are means signif. different? (P < 0.05)	Yes
		wt	tjp1b Δ16bp / Δ16bp			wt	tjp1b Δ16bp / Δ16bp		One- or two-tailed P value?	Two-tailed				wt	tjp1b Δ16bp / Δ16bp			wt	tjp1b Δ16bp / Δ16bp		One- or two-tailed P value?	Two-tailed
	avg. for animal	766.93	0		avg. for animal	0.762107	0		Welch-corrected t, df	t=16.53, df=4.000			avg. for animal	96.0589	1.5182		avg. for animal	0.932258	0.0147342		Welch-corrected t, df	t=28.09, df=2.054
		1054.66	0			1.04802	0							105.214	2.045			1.02111	0.0198469
		1064.29	0			1.05759	0		How big is the difference?					107.844	2.1733			1.04663	0.021092		How big is the difference?
		1072.58	0.227746			1.06584	0.000226314		Mean ± SEM of column A	1.002					1.0328				0.0100234		Mean ± SEM of column A	1
		1073.19	0			1.06644	0		Mean ± SEM of column B	0					3.5038				0.0340046		Mean ± SEM of column B	0.01994
			0				0		Difference between means	-1.002 ± 0.06061											Difference between means	-0.9801 ± 0.03490
			0				0		95% confidence interval	-1.170 to -0.8337											95% confidence interval	-1.126 to -0.8337
									R square	0.9856											R square	0.9974
									F test to compare variances												F test to compare variances
	avg.	1006.33	0.0325351		avg.	1	3.23305e-05		F,DFn, Dfd	Infinity, 4, 6			avg.	103.039	2.05462		avg.	1	0.0199402		F,DFn, Dfd	44.42, 2, 4
	stdev	134.04	0.0860799		stdev	0.133196	8.55385e-05		P value	<0.0001			stdev	6.18629	0.928192		stdev	0.0600384	0.00900817		P value	0.0037
	sterr	59.9443	0.0325351		sterr	0.0595673	3.23305e-05		P value summary	****			sterr	3.57166	0.4151		sterr	0.0346632	0.00402857		P value summary	**
	n	5	7		n	5	7		Are variances significantly different?	Yes			n	3	5		n	3	5		Are variances significantly different?	Yes
									Unpaired t test with Welch's correction - wt to mut												Unpaired t test with Welch's correction - wt to mut
Fig.1M	ZO-1 Pixel Intensity								P value	<0.0001		Fig.1N	ZO-1 Pixel Intensity								P value	0.0102
	tjp1b 16bp (fh448)								P value summary	****			tjp1b 16bp (fh448)								P value summary	*
		RAW pixel values				NORMALIZED to wt avg.			Are means signif. different? (P < 0.05)	Yes				RAW pixel values				NORMALIZED to wt avg.			Are means signif. different? (P < 0.05)	Yes
		wt	tjp1b Δ16bp / Δ16bp			wt	tjp1b Δ16bp / Δ16bp		One- or two-tailed P value?	Two-tailed				wt	tjp1b Δ16bp / Δ16bp			wt	tjp1b Δ16bp / Δ16bp		One- or two-tailed P value?	Two-tailed
	avg. for animal	1120.69	85.2097		avg. for animal	0.764482	0.058126		Welch-corrected t, df	t=14.51, df=4.205			avg. for animal	73.6893	18.174		avg. for animal	0.84803	0.20915		Welch-corrected t, df	t=8.480, df=2.198
		1527.92	76.0348			1.04227	0.0518673							84.9428	13.715			0.977537	0.157835
		1444.4	111.954			0.9853	0.0763694		How big is the difference?					102.052	12.843			1.17443	0.1478		How big is the difference?
		1568.14	34.7476			1.06971	0.0237031		Mean ± SEM of column A	1					10.874				0.12514		Mean ± SEM of column A	1
		1668.59	10.216			1.13823	0.0069689		Mean ± SEM of column B	0.04857					20.799				0.239359		Mean ± SEM of column B	0.1759
			116.753				0.079643		Difference between means	-0.9514 ± 0.06555											Difference between means	-0.8241 ± 0.09719
			57.75				0.0393943		95% confidence interval	-1.130 to -0.7729											95% confidence interval	-1.208 to -0.4401
									R square	0.9804											R square	0.9703
									F test to compare variances												F test to compare variances
	avg.	1465.95	70.3806		avg.	1	0.0480103		F,DFn, Dfd	28.02, 4, 6			avg.	86.8947	15.281		avg.	1	0.175857		F,DFn, Dfd	12.24, 2, 4
	stdev	209.174	39.1143		stdev	0.142688	0.0266819		P value	0.001			stdev	14.2817	4.08153		stdev	0.164357	0.046971		P value	0.0394
	sterr	93.5453	14.7838		sterr	0.0638121	0.0100848		P value summary	**			sterr	8.24557	1.82532		sterr	0.0948915	0.0210061		P value summary	*
	n	5	7		n	5	7		Are variances significantly different?	Yes			n	3	5		n	3	5		Are variances significantly different?	Yes
