# Supplementary material for: Electrical synaptic transmission requires a postsynaptic scaffolding protein
Source: eLife. 2021 Apr 28;10:e66898. doi: 10.7554/eLife.66898 (PMC8081524; doi:10.7554/eLife.66898)
Supplement: Figure 2—figure supplement 1—source data 1. [file elife-66898-fig2-figsupp1-data1.xlsx]

## Sheet: Fig2-figsupp1
	Hindbrain Club Endings												Spinal cord M/CoLo
									Unpaired t test with Welch's correction - wt to mut												Unpaired t test with Welch's correction - wt to mut
Fig.S2E	Cx35.5 Pixel Intensity								P value	0.0064		Fig.S2F	Cx35.5 Pixel Intensity								P value	<0.0001
	gjd1a dis3 (fh360)								P value summary	**			gjd1a dis3 (fh360)								P value summary	****
		RAW pixel values				NORMALIZED to wt avg.			Are means signif. different? (P < 0.05)	Yes				RAW pixel values				NORMALIZED to wt avg.			Are means signif. different? (P < 0.05)	Yes
		wt	gjd1a dis3 /dis3			wt	gjd1a dis3 /dis3		One- or two-tailed P value?	Two-tailed				wt	gjd1a dis3 /dis3			wt	gjd1a dis3 /dis3		One- or two-tailed P value?	Two-tailed
	avg. for animal	1539.48	424.91		avg. for animal	0.552544	0.152506		Welch-corrected t, df	t=5.174, df=4.064			avg. for animal	23.7183	1.50647		avg. for animal	0.934084	0.0593284		Welch-corrected t, df	t=32.79, df=3.229
		4025.13	279.51			1.44468	0.10032							24.8788	1.27438			0.979787	0.0501879
		3692.71	259.371			1.32537	0.093092		How big is the difference?					27.0483	1.63563			1.06523	0.0644148		How big is the difference?
		2459.6	335.08			0.882786	0.120265		Mean ± SEM of column A	0.998				25.9228	1.94188			1.0209	0.0764757		Mean ± SEM of column A	1
		2213.96	469.158			0.794622	0.168388		Mean ± SEM of column B	0.126											Mean ± SEM of column B	0.0626
									Difference between means	-0.8720 ± 0.1685											Difference between means	-0.9374 ± 0.02859
									95% confidence interval	-1.337 to -0.4070											95% confidence interval	-1.025 to -0.8500
									R square	0.8682											R square	0.997
									F test to compare variances												F test to compare variances
	avg.	2786.18	353.606		avg.	1	0.126914		F,DFn, Dfd	124.7, 4, 4			avg.	25.3921	1.58959		avg.	1	0.0626017		F,DFn, Dfd	26.19, 3, 3
	stdev	1042.25	91.0359		stdev	0.374079	0.0326742		P value	0.0004			stdev	1.42474	0.278384		stdev	0.0561098	0.0109634		P value	0.0237
	sterr	466.108	40.7125		sterr	0.167293	0.0146123		P value summary	***			sterr	0.712372	0.139192		sterr	0.0280549	0.00548172		P value summary	*
	n	5	5		n	5	5		Are variances significantly different?	Yes			n	4	4		n	4	4		Are variances significantly different?	Yes
									Unpaired t test with Welch's correction - wt to mut												Unpaired t test with Welch's correction - wt to mut
Fig.S2E	Cx34.1 Pixel Intensity								P value	0.0007		Fig.S2F	Cx34.1 Pixel Intensity								P value	0.0003
	gjd1a dis3 (fh360)								P value summary	***			gjd1a dis3 (fh360)								P value summary	***
		RAW pixel values				NORMALIZED to wt avg.			Are means signif. different? (P < 0.05)	Yes				RAW pixel values				NORMALIZED to wt avg.			Are means signif. different? (P < 0.05)	Yes
		wt	gjd1a dis3 /dis3			wt	gjd1a dis3 /dis3		One- or two-tailed P value?	Two-tailed				wt	gjd1a dis3 /dis3			wt	gjd1a dis3 /dis3		One- or two-tailed P value?	Two-tailed
	avg. for animal	1766.56	0		avg. for animal	0.638176	0		Welch-corrected t, df	t=9.411, df=4.000			avg. for animal	31.1822	1.16941		avg. for animal	0.972806	0.0364827		Welch-corrected t, df	t=17.97, df=3.053
		3300.09	0			1.19217	0							28.13	0.900625			0.877585	0.0280972
		3445.12	0			1.24456	0		How big is the difference?					32.5522	1.62187			1.01555	0.0505984		How big is the difference?
		2673.51	0			0.965815	0		Mean ± SEM of column A	1				36.3511	1.46938			1.13406	0.0458408		Mean ± SEM of column A	1
		2655.43	0			0.95928	0		Mean ± SEM of column B	0											Mean ± SEM of column B	0.04025
									Difference between means	-1.000 ± 0.1063											Difference between means	-0.9597 ± 0.05342
									95% confidence interval	-1.295 to -0.7050											95% confidence interval	-1.128 to -0.7914
									R square	0.9568											R square	0.9906
									F test to compare variances												F test to compare variances
	avg.	2768.14	0		avg.	1	0		F,DFn, Dfd	Infinity, 4, 4			avg.	32.0539	1.29032		avg.	1	0.0402548		F,DFn, Dfd	113.0, 3, 3
	stdev	664.472	0		stdev	0.240042	0		P value	<0.0001			stdev	3.40936	0.320661		stdev	0.106363	0.0100038		P value	0.0028
	sterr	297.161	0		sterr	0.10735	0		P value summary	****			sterr	1.70468	0.16033		sterr	0.0531817	0.0050019		P value summary	**
	n	5	5		n	5	5		Are variances significantly different?	Yes			n	4	4		n	4	4		Are variances significantly different?	Yes
									Unpaired t test with Welch's correction - wt to mut												Unpaired t test with Welch's correction - wt to mut
Fig.S2E	ZO-1 Pixel Intensity								P value	0.0057		Fig.S2F	ZO-1 Pixel Intensity								P value	0.0079
	gjd1a dis3 (fh360)								P value summary	**			gjd1a dis3 (fh360)								P value summary	**
		RAW pixel values				NORMALIZED to wt avg.			Are means signif. different? (P < 0.05)	Yes				RAW pixel values				NORMALIZED to wt avg.			Are means signif. different? (P < 0.05)	Yes
		wt	gjd1a dis3 /dis3			wt	gjd1a dis3 /dis3		One- or two-tailed P value?	Two-tailed				wt	gjd1a dis3 /dis3			wt	gjd1a dis3 /dis3		One- or two-tailed P value?	Two-tailed
	avg. for animal	2429.61	1790.33		avg. for animal	0.712162	0.524777		Welch-corrected t, df	t=4.578, df=5.086			avg. for animal	22.7661	12.6535		avg. for animal	0.997444	0.554385		Welch-corrected t, df	t=4.713, df=4.269
		4092.96	1846.75			1.19972	0.541313							19.7012	11.6519			0.863161	0.5105
		3748.89	2222.22			1.09886	0.651371		How big is the difference?					20.2222	9.93187			0.885989	0.435142		How big is the difference?
		3540.79	2315.06			1.03787	0.678583		Mean ± SEM of column A	1				28.6083	14.5325			1.25341	0.636707		Mean ± SEM of column A	1
		3245.78	1964.04			0.951393	0.575693		Mean ± SEM of column B	0.594											Mean ± SEM of column B	0.5342
									Difference between means	-0.4060 ± 0.08869											Difference between means	-0.4658 ± 0.09884
									95% confidence interval	-0.6328 to -0.1792											95% confidence interval	-0.7336 to -0.1981
									R square	0.8047											R square	0.8388
									F test to compare variances												F test to compare variances
	avg.	3411.61	2027.68		avg.	1	0.594347		F,DFn, Dfd	7.228, 4, 4			avg.	22.8245	12.1924		avg.	1	0.534183		F,DFn, Dfd	4.507, 3, 3
	stdev	629.781	231.06		stdev	0.1846	0.0677276		P value	0.0814			stdev	4.08179	1.92274		stdev	0.178834	0.0842405		P value	0.2479
	sterr	281.647	103.333		sterr	0.0825554	0.0302887		P value summary	ns			sterr	2.0409	0.961372		sterr	0.0894171	0.0421203		P value summary	ns
	n	5	5		n	5	5		Are variances significantly different?	No			n	4	4		n	4	4		Are variances significantly different?	No
