# Supplementary material for: Electrical synaptic transmission requires a postsynaptic scaffolding protein
Source: eLife. 2021 Apr 28;10:e66898. doi: 10.7554/eLife.66898 (PMC8081524; doi:10.7554/eLife.66898)
Supplement: Figure 2—source data 1. [file elife-66898-fig2-data1.xlsx]

## Sheet: Fig2
	Hindbrain Club Endings												Spinal cord M/CoLo
									Unpaired t test with Welch's correction - wt to mut												Unpaired t test with Welch's correction - wt to mut
Fig.2M	Cx35.5 Pixel Intensity								P value	0.0005		Fig.2N	Cx35.5 Pixel Intensity								P value	<0.0001
	gjd2a 5bp (fh437)								P value summary	***			gjd2a 5bp (fh437)								P value summary	****
		RAW pixel values				NORMALIZED to wt avg.			Are means signif. different? (P < 0.05)	Yes				RAW pixel values				NORMALIZED to wt avg.			Are means signif. different? (P < 0.05)	Yes
		wt	gjd2a Δ5bp / Δ5bp			wt	gjd2a Δ5bp / Δ5bp		One- or two-tailed P value?	Two-tailed				wt	gjd2a Δ5bp / Δ5bp			wt	gjd2a Δ5bp / Δ5bp		One- or two-tailed P value?	Two-tailed
	avg. for animal	2430.21	264.762		avg. for animal	1.18105	0.128671		Welch-corrected t, df	t=8.842, df=4.456			avg. for animal	54.0322	1.57062		avg. for animal	0.796755	0.0231603		Welch-corrected t, df	t=18.04, df=4.003
		1775.51	0			0.862878	0							66.7417	1.465			0.984167	0.0216028
		1457.86	20.6146			0.708501	0.0100185		How big is the difference?					71.0519	1.30882			1.04773	0.0192998		How big is the difference?
		1957.62	0			0.951379	0		Mean ± SEM of column A	1				72.8211	1.64571			1.07381	0.0242676		Mean ± SEM of column A	1
		2667.12	0			1.29619	0		Mean ± SEM of column B	0.028				74.43	1.26875			1.09754	0.0187089		Mean ± SEM of column B	0.02141
									Difference between means	-0.9720 ± 0.1099											Difference between means	-0.9786 ± 0.05423
									95% confidence interval	-1.265 to -0.6787											95% confidence interval	-1.129 to -0.8281
									R square	0.9461											R square	0.9879
									F test to compare variances												F test to compare variances
	avg.	2057.66	57.0754		avg.	1	0.027738		F,DFn, Dfd	17.48, 4, 4			avg.	67.8154	1.45178		avg.	1	0.0214079		F,DFn, Dfd	2555, 4, 4
	stdev	489.8	116.443		stdev	0.238037	0.05659		P value	0.0169			stdev	8.22213	0.16267		stdev	0.121243	0.00239871		P value	<0.0001
	sterr	219.045	52.075		sterr	0.106453	0.0253078		P value summary	*			sterr	3.67705	0.0727481		sterr	0.0542215	0.00107274		P value summary	****
	n	5	5		n	5	5		Are variances significantly different?	Yes			n	5	5		n	5	5		Are variances significantly different?	Yes
									Unpaired t test with Welch's correction - wt to mut												Unpaired t test with Welch's correction - wt to mut
Fig.2M	Cx34.1 Pixel Intensity								P value	0.0006		Fig.2N	Cx34.1 Pixel Intensity								P value	<0.0001
	gjd2a 5bp (fh437)								P value summary	***			gjd2a 5bp (fh437)								P value summary	****
		RAW pixel values				NORMALIZED to wt avg.			Are means signif. different? (P < 0.05)	Yes				RAW pixel values				NORMALIZED to wt avg.			Are means signif. different? (P < 0.05)	Yes
		wt	gjd2a Δ5bp / Δ5bp			wt	gjd2a Δ5bp / Δ5bp		One- or two-tailed P value?	Two-tailed				wt	gjd2a Δ5bp / Δ5bp			wt	gjd2a Δ5bp / Δ5bp		One- or two-tailed P value?	Two-tailed
	avg. for animal	2050.77	137.555		avg. for animal	1.06356	0.0713382		Welch-corrected t, df	t=8.770, df=4.411			avg. for animal	34.4039	4.58563		avg. for animal	0.877109	0.116908		Welch-corrected t, df	t=24.63, df=4.647
		1726.19	199.626			0.895228	0.103529							41.5789	4.71667			1.06003	0.120249
		1519.49	318.545			0.788033	0.165203		How big is the difference?					39.0588	5.41412			0.995782	0.13803		How big is the difference?
		1725.67	85.6212			0.894961	0.0444045		Mean ± SEM of column A	1				39.3222	6.63786			1.0025	0.169229		Mean ± SEM of column A	1
		2618.92	253.685			1.35821	0.131565		Mean ± SEM of column B	0.102				41.7572	4.81062			1.06458	0.122644		Mean ± SEM of column B	0.1334
									Difference between means	-0.8980 ± 0.1024											Difference between means	-0.8666 ± 0.03519
									95% confidence interval	-1.172 to -0.6239											95% confidence interval	-0.9591 to -0.7740
									R square	0.9458											R square	0.9924
									F test to compare variances												F test to compare variances
	avg.	1928.21	199.006		avg.	1	0.103208		F,DFn, Dfd	19.40, 4, 4			avg.	39.2242	5.23298		avg.	1	0.133412		F,DFn, Dfd	12.27, 4, 4
	stdev	430.404	92.0762		stdev	0.223214	0.0477521		P value	0.014			stdev	2.96787	0.847131		stdev	0.0756644	0.0215971		P value	0.0323
	sterr	192.483	41.1777		sterr	0.0998245	0.0213554		P value summary	*			sterr	1.32727	0.378848		sterr	0.0338381	0.00965854		P value summary	*
	n	5	5		n	5	5		Are variances significantly different?	Yes			n	5	5		n	5	5		Are variances significantly different?	Yes
									Unpaired t test with Welch's correction - wt to mut												Unpaired t test with Welch's correction - wt to mut
Fig.2M	ZO-1 Pixel Intensity								P value	0.0025		Fig.2N	ZO-1 Pixel Intensity								P value	0.0012
	gjd2a 5bp (fh437)								P value summary	**			gjd2a 5bp (fh437)								P value summary	**
		RAW pixel values				NORMALIZED to wt avg.			Are means signif. different? (P < 0.05)	Yes				RAW pixel values				NORMALIZED to wt avg.			Are means signif. different? (P < 0.05)	Yes
		wt	gjd2a Δ5bp / Δ5bp			wt	gjd2a Δ5bp / Δ5bp		One- or two-tailed P value?	Two-tailed				wt	gjd2a Δ5bp / Δ5bp			wt	gjd2a Δ5bp / Δ5bp		One- or two-tailed P value?	Two-tailed
	avg. for animal	3144.69	1682.69		avg. for animal	1.05972	0.567047		Welch-corrected t, df	t=4.770, df=6.533			avg. for animal	25.1817	14.5169		avg. for animal	0.764417	0.440676		Welch-corrected t, df	t=6.374, df=5.246
		2399.42	1293.3			0.808574	0.435827							30.0561	12.8767			0.912386	0.390886
		2279.88	1724.7			0.768293	0.581203		How big is the difference?					35.3987	13.6806			1.07457	0.415289		How big is the difference?
		3163.66	781.263			1.06611	0.263276		Mean ± SEM of column A	1.002				33.4494	16.1279			1.01539	0.489579		Mean ± SEM of column A	1
		3849.68	1399.3			1.2973	0.471545		Mean ± SEM of column B	0.464				40.6256	18.7144			1.23323	0.568096		Mean ± SEM of column B	0.4609
									Difference between means	-0.5380 ± 0.1128											Difference between means	-0.5391 ± 0.08458
									95% confidence interval	-0.8086 to -0.2674											95% confidence interval	-0.7535 to -0.3247
									R square	0.7769											R square	0.8856
									F test to compare variances												F test to compare variances
	avg.	2967.47	1376.25		avg.	1	0.46378		F,DFn, Dfd	2.802, 4, 4			avg.	32.9423	15.1833		avg.	1	0.460905		F,DFn, Dfd	6.261, 4, 4
	stdev	641.026	379.719		stdev	0.216018	0.127961		P value	0.3424			stdev	5.78535	2.31212		stdev	0.175621	0.0701868		P value	0.1034
	sterr	286.676	169.816		sterr	0.0966061	0.0572258		P value summary	ns			sterr	2.58729	1.03401		sterr	0.07854	0.0313885		P value summary	ns
	n	5	5		n	5	5		Are variances significantly different?	No			n	5	5		n	5	5		Are variances significantly different?	No
									Unpaired t test with Welch's correction - wt to mut												Unpaired t test with Welch's correction - wt to mut
Fig.2M	Cx35.5 Pixel Intensity								P value	<0.0001		Fig.2N	Cx35.5 Pixel Intensity								P value	0.0015
	gjd1a 8bp (fh436)								P value summary	****			gjd1a 8bp (fh436)								P value summary	**
		RAW pixel values				NORMALIZED to wt avg.			Are means signif. different? (P < 0.05)	Yes				RAW pixel values				NORMALIZED to wt avg.			Are means signif. different? (P < 0.05)	Yes
		wt	gjd1a Δ8bp / Δ8bp			wt	gjd1a Δ8bp / Δ8bp		One- or two-tailed P value?	Two-tailed				wt	gjd1a Δ8bp / Δ8bp			wt	gjd1a Δ8bp / Δ8bp		One- or two-tailed P value?	Two-tailed
	avg. for animal	2368.03	1037.82		avg. for animal	1.15083	0.50437		Welch-corrected t, df	t=9.284, df=7.060			avg. for animal	92.4	5.44688		avg. for animal	1.36252	0.0803192		Welch-corrected t, df	t=24.38, df=2.034
		2613.1	689.128			1.26993	0.334908							81.3867	6.54889			1.20012	0.0965694
		2319.74	230.398			1.12737	0.111971		How big is the difference?					84.6278	5.35529			1.24791	0.0789687		How big is the difference?
		1853.08	222.557			0.900572	0.10816		Mean ± SEM of column A	0.9975					6.41				0.0945213		Mean ± SEM of column A	1
			141.252				0.0686466		Mean ± SEM of column B	0.16					6.84867				0.10099		Mean ± SEM of column B	0.07107
			95.1655				0.0462493		Difference between means	-0.8375 ± 0.09021											Difference between means	-0.9289 ± 0.03810
			166.596				0.0809639		95% confidence interval	-1.050 to -0.6246											95% confidence interval	-1.090 to -0.7676
									R square	0.9243											R square	0.9966
									F test to compare variances												F test to compare variances
	avg.	2288.49	368.989		avg.	1.11218	0.179324		F,DFn, Dfd	1.265, 6, 3			avg.	86.1381	6.12195		avg.	1.27019	0.0902737		F,DFn, Dfd	69.76, 2, 4
	stdev	317.416	355.501		stdev	0.154261	0.172769		P value	0.9161			stdev	5.65988	0.677653		stdev	0.0834602	0.00999262		P value	0.0016
	sterr	158.708	134.367		sterr	0.0771303	0.0653006		P value summary	ns			sterr	3.26773	0.303056		sterr	0.0481858	0.00446883		P value summary	**
	n	4	7		n	4	7		Are variances significantly different?	No			n	3	5		n	3	5		Are variances significantly different?	Yes
									Unpaired t test with Welch's correction - wt to mut												Unpaired t test with Welch's correction - wt to mut
Fig.2M	Cx34.1 Pixel Intensity								P value	0.0065		Fig.2N	Cx34.1 Pixel Intensity								P value	0.0023
	gjd1a 8bp (fh436)								P value summary	**			gjd1a 8bp (fh436)								P value summary	**
		RAW pixel values				NORMALIZED to wt avg.			Are means signif. different? (P < 0.05)	Yes				RAW pixel values				NORMALIZED to wt avg.			Are means signif. different? (P < 0.05)	Yes
		wt	gjd1a Δ8bp / Δ8bp			wt	gjd1a Δ8bp / Δ8bp		One- or two-tailed P value?	Two-tailed				wt	gjd1a Δ8bp / Δ8bp			wt	gjd1a Δ8bp / Δ8bp		One- or two-tailed P value?	Two-tailed
	avg. for animal	2867.7	0		avg. for animal	1.48724	0		Welch-corrected t, df	t=6.796, df=3.000			avg. for animal	92.4633	0.494375		avg. for animal	2.3573	0.0126038		Welch-corrected t, df	t=20.71, df=2.000
		2707.89	0			1.40435	0							78.6289	0.393889			2.0046	0.010042
		2027.53	0			1.05151	0		How big is the difference?					89.1183	0.418824			2.27202	0.0106777		How big is the difference?
		1418.13	0			0.735463	0		Mean ± SEM of column A	1					0.427778				0.010906		Mean ± SEM of column A	1
			0				0		Mean ± SEM of column B	0					0.475333				0.0121184		Mean ± SEM of column B	0.005096
			0				0		Difference between means	-1.000 ± 0.1471											Difference between means	-0.9949 ± 0.04805
			0				0		95% confidence interval	-1.468 to -0.5317											95% confidence interval	-1.202 to -0.7882
									R square	0.939											R square	0.9954
									F test to compare variances												F test to compare variances
	avg.	2255.31	0		avg.	1.16964	0		F,DFn, Dfd	Infinity, 3, 6			avg.	86.7369	0.44204		avg.	2.21131	0.0112696		F,DFn, Dfd	30160, 2, 4
	stdev	666.486	0		stdev	0.34565	0		P value	<0.0001			stdev	7.21814	0.041558		stdev	0.184023	0.0010595		P value	<0.0001
	sterr	333.243	0		sterr	0.172825	0		P value summary	****			sterr	4.16739	0.0185853		sterr	0.106245	0.000473823		P value summary	****
	n	4	7		n	4	7		Are variances significantly different?	Yes			n	3	5		n	3	5		Are variances significantly different?	Yes
									Unpaired t test with Welch's correction - wt to mut												Unpaired t test with Welch's correction - wt to mut
Fig.2M	ZO-1 Pixel Intensity								P value	0.0004		Fig.2N	ZO-1 Pixel Intensity								P value	0.0012
	gjd1a 8bp (fh436)								P value summary	***			gjd1a 8bp (fh436)								P value summary	**
		RAW pixel values				NORMALIZED to wt avg.			Are means signif. different? (P < 0.05)	Yes				RAW pixel values				NORMALIZED to wt avg.			Are means signif. different? (P < 0.05)	Yes
		wt	gjd1a Δ8bp / Δ8bp			wt	gjd1a Δ8bp / Δ8bp		One- or two-tailed P value?	Two-tailed				wt	gjd1a Δ8bp / Δ8bp			wt	gjd1a Δ8bp / Δ8bp		One- or two-tailed P value?	Two-tailed
	avg. for animal	2635.34	1920		avg. for animal	0.888075	0.647016		Welch-corrected t, df	t=6.082, df=7.613			avg. for animal	86.0589	33.4344		avg. for animal	2.61241	1.01494		Welch-corrected t, df	t=14.56, df=2.683
		2879.09	1657.68			0.970217	0.558619							76.2828	39.5644			2.31565	1.20102
		2649.29	1268.12			0.892779	0.427342		How big is the difference?					82.0139	35.5412			2.48962	1.07889		How big is the difference?
		2131.49	1179.43			0.718287	0.397455		Mean ± SEM of column A	1					39.2611				1.19181		Mean ± SEM of column A	1
			1026.88				0.346045		Mean ± SEM of column B	0.4929					36.4233				1.10567		Mean ± SEM of column B	0.4524
			883.103				0.297595		Difference between means	-0.5071 ± 0.08339											Difference between means	-0.5476 ± 0.03760
			944.285				0.318213		95% confidence interval	-0.7011 to -0.3131											95% confidence interval	-0.6757 to -0.4196
									R square	0.8293											R square	0.9875
									F test to compare variances												F test to compare variances
	avg.	2573.8	1268.5		avg.	0.86734	0.427469		F,DFn, Dfd	1.524, 6, 3			avg.	81.4519	36.8449		avg.	2.47256	1.11847		F,DFn, Dfd	3.609, 2, 4
	stdev	315.342	386.41		stdev	0.106266	0.130216		P value	0.784			stdev	4.91223	2.58568		stdev	0.149116	0.0784913		P value	0.2543
	sterr	157.671	146.049		sterr	0.0531331	0.0492168		P value summary	ns			sterr	2.83608	1.15635		sterr	0.0860922	0.0351024		P value summary	ns
	n	4	7		n	4	7		Are variances significantly different?	No			n	3	5		n	3	5		Are variances significantly different?	No
									Unpaired t test with Welch's correction - wt to mut												Unpaired t test with Welch's correction - wt to mut
Fig.2M	Cx35.5 Pixel Intensity								P value	0.0006		Fig.2N	Cx35.5 Pixel Intensity								P value	0.003
	gjd2a 5bp (fh437); gjd1a dis3 (fh360) double mutants								P value summary	***			gjd2a 5bp (fh437); gjd1a dis3 (fh360) double mutants								P value summary	**
		RAW pixel values				NORMALIZED to wt avg.			Are means signif. different? (P < 0.05)	Yes				RAW pixel values				NORMALIZED to wt avg.			Are means signif. different? (P < 0.05)	Yes
		wt	gjd2a; gjd1a			wt	gjd2a; gjd1a		One- or two-tailed P value?	Two-tailed				wt	gjd2a; gjd1a			wt	gjd2a; gjd1a		One- or two-tailed P value?	Two-tailed
	avg. for animal	766.806	10.9806		avg. for animal	0.761175	0.0109		Welch-corrected t, df	t=6.597, df=6.001			avg. for animal	13.7894	0.454706		avg. for animal	0.203338	0.00670506		Welch-corrected t, df	t=17.99, df=2.017
		1032.5	6.75106			1.02492	0.00670147							13.9228	0.340556			0.205304	0.00502181
		1222.88	9.24			1.2139	0.00917214		How big is the difference?					11.7277	0.407778			0.172935	0.00601306		How big is the difference?
		1239.8	2.89563			1.46565	0.00287437		Mean ± SEM of column A	1					0.298125				0.00439613		Mean ± SEM of column A	1
		1230.99	0.585634			1.45523	0.000692314		Mean ± SEM of column B	0.00386					0.188889				0.00278534		Mean ± SEM of column B	0.02571
		369.112				0.43635			Difference between means	-0.9961 ± 0.1510											Difference between means	-0.9743 ± 0.05416
		543.728				0.642775			95% confidence interval	-1.366 to -0.6267											95% confidence interval	-1.205 to -0.7431
									R square	0.8788											R square	0.9938
									F test to compare variances												F test to compare variances
	avg.	915.118	6.09059		avg.	1	0.00606806		F,DFn, Dfd	26097, 6, 4			avg.	13.1466	0.338011		avg.	0.193859	0.00498428		F,DFn, Dfd	143.2, 2, 4
	stdev	358.641	4.32377		stdev	0.402654	0.00425683		P value	<0.0001			stdev	1.23067	0.102859		stdev	0.0181473	0.00151675		P value	0.0004
	sterr	135.554	1.93365		sterr	0.152189	0.00190371		P value summary	****			sterr	0.710526	0.0459999		sterr	0.0104774	0.000678311		P value summary	***
	n	7	5		n	7	5		Are variances significantly different?	Yes			n	3	5		n	3	5		Are variances significantly different?	Yes
									Unpaired t test with Welch's correction - wt to mut												Unpaired t test with Welch's correction - wt to mut
Fig.2M	Cx34.1 Pixel Intensity								P value	0.0003		Fig.2N	Cx34.1 Pixel Intensity								P value	0.0006
	gjd2a 5bp (fh437); gjd1a dis3 (fh360) double mutants								P value summary	***			gjd2a 5bp (fh437); gjd1a dis3 (fh360) double mutants								P value summary	***
		RAW pixel values				NORMALIZED to wt avg.			Are means signif. different? (P < 0.05)	Yes				RAW pixel values				NORMALIZED to wt avg.			Are means signif. different? (P < 0.05)	Yes
		wt	gjd2a; gjd1a			wt	gjd2a; gjd1a		One- or two-tailed P value?	Two-tailed				wt	gjd2a; gjd1a			wt	gjd2a; gjd1a		One- or two-tailed P value?	Two-tailed
	avg. for animal	644.067	67.0225		avg. for animal	0.788811	0.0820848		Welch-corrected t, df	t=7.151, df=6.328			avg. for animal	38.3276	1.69823		avg. for animal	0.977143	0.0432956		Welch-corrected t, df	t=34.48, df=2.137
		779.446	75.2865			0.954614	0.0922059							37.0367	2.09333			0.94423	0.0533684
		1026	154.396			1.25657	0.189094		How big is the difference?					34.89	1.83278			0.889502	0.0467257		How big is the difference?
		823.938	66.0953			1.46852	0.0809492		Mean ± SEM of column A	1					1.32438				0.0337642		Mean ± SEM of column A	1
		680.376	15.4868			1.21265	0.0276024		Mean ± SEM of column B	0.07897					1.05167				0.0268117		Mean ± SEM of column B	0.04354
		262.478				0.46782			Difference between means	-0.9210 ± 0.1288											Difference between means	-0.9565 ± 0.02774
		477.47				0.851006			95% confidence interval	-1.232 to -0.6098											95% confidence interval	-1.069 to -0.8442
									R square	0.8899											R square	0.9982
									F test to compare variances												F test to compare variances
	avg.	670.539	75.6574		avg.	1	0.0943872		F,DFn, Dfd	50.82, 6, 4			avg.	36.7514	1.60008		avg.	0.936958	0.0407931		F,DFn, Dfd	17.64, 2, 4
	stdev	247.093	49.9659		stdev	0.337303	0.0586648		P value	0.002			stdev	1.73648	0.413477		stdev	0.0442707	0.0105414		P value	0.0207
	sterr	93.3924	22.3454		sterr	0.127489	0.0262357		P value summary	**			sterr	1.00256	0.184912		sterr	0.0255597	0.00471424		P value summary	*
	n	7	5		n	7	5		Are variances significantly different?	Yes			n	3	5		n	3	5		Are variances significantly different?	Yes
									Unpaired t test with Welch's correction - wt to mut												Unpaired t test with Welch's correction - wt to mut
Fig.2M	ZO-1 Pixel Intensity								P value	0.0842		Fig.2N	ZO-1 Pixel Intensity								P value	0.0024
	gjd2a 5bp (fh437); gjd1a dis3 (fh360) double mutants								P value summary	ns			gjd2a 5bp (fh437); gjd1a dis3 (fh360) double mutants								P value summary	**
		RAW pixel values				NORMALIZED to wt avg.			Are means signif. different? (P < 0.05)	No				RAW pixel values				NORMALIZED to wt avg.			Are means signif. different? (P < 0.05)	Yes
		wt	gjd2a; gjd1a			wt	gjd2a; gjd1a		One- or two-tailed P value?	Two-tailed				wt	gjd2a; gjd1a			wt	gjd2a; gjd1a		One- or two-tailed P value?	Two-tailed
	avg. for animal	1493.27	1305.28		avg. for animal	0.902229	0.788647		Welch-corrected t, df	t=1.957, df=8.426			avg. for animal	13.32	7.07471		avg. for animal	0.404343	0.21476		Welch-corrected t, df	t=7.854, df=3.526
		1498.75	881.606			0.905542	0.532665							15.6283	7.99222			0.474415	0.242613
		1973.24	1794.95			1.19223	1.08451		How big is the difference?					15.1382	9.36722			0.459538	0.284352		How big is the difference?
		1494.08	1076.66			1.3342	0.650512		Mean ± SEM of column A	1					9.0575				0.27495		Mean ± SEM of column A	1
		1314.45	352.096			1.17379	0.314417		Mean ± SEM of column B	0.6747					7.67222				0.232899		Mean ± SEM of column B	0.5602
		571.513				0.510354			Difference between means	-0.3253 ± 0.1662											Difference between means	-0.4398 ± 0.05599
		1099.3				0.98166			95% confidence interval	-0.7053 to 0.05469											95% confidence interval	-0.6038 to -0.2757
									R square	0.3125											R square	0.9459
									F test to compare variances												F test to compare variances
	avg.	1349.23	1082.12		avg.	1	0.674149		F,DFn, Dfd	1.125, 4, 6			avg.	14.6955	8.23277		avg.	0.446099	0.249915		F,DFn, Dfd	1.608, 2, 4
	stdev	432.434	531.766		stdev	0.270004	0.287874		P value	0.8527			stdev	1.21618	0.959212		stdev	0.0369185	0.0291179		P value	0.6147
	sterr	163.445	237.813		sterr	0.102052	0.128741		P value summary	ns			sterr	0.702162	0.428973		sterr	0.0213149	0.0130219		P value summary	ns
	n	7	5		n	7	5		Are variances significantly different?	No			n	3	5		n	3	5		Are variances significantly different?	No
