# Supplementary material for: Electrical synaptic transmission requires a postsynaptic scaffolding protein
Source: eLife. 2021 Apr 28;10:e66898. doi: 10.7554/eLife.66898 (PMC8081524; doi:10.7554/eLife.66898)
Supplement: Figure 3—figure supplement 1—source data 1. [file elife-66898-fig3-figsupp1-data1.xlsx]

## Sheet: Fig3-figsupp1
Fig.S3C	Electrical (mV)		Chemical (mV)
	wt	wt (MA)	wt	wt (MA)	wt (CNQX/DAP5)	gjd1a Δ8bp / Δ8bp	gjd1a Δ8bp / Δ8bp (CNQX/DAP5)	gjd2a Δ5bp / Δ5bp	gjd2a Δ5bp / Δ5bp (CNQX/DAP5)
	3.9	1.4	0.8	4.2	0.2	6.5	0.6	5.9	0.2
	9.7	1.8	1.8	5.9	0.1	2.2	0.1	6.7	0.3
	9	2	3.9	12.4	0.3	0.6	0.1	2.8	0.3
	5.3	0.4	1.8	4.3	0.2	3.1	0.2	3.8	0.1
	7.9	1.2	1.7	4.1	0.3	2.5	0.1	0.9	0.2
	5.4	0.4	0.9	2.3	0.1			1.3	0.2
Avg	6.9	1.2	1.8	5.5	0.2	3	0.2	3.6	0.2
SEM	0.9	0.3	0.5	1.5	0.03	1	0.1	1	0.03
n	6	6	6	6	6	5	5	6	6
Mann Whitney test p-value		0.005		0.008	0.004	n.s.(0.6)	0.014	n.s.(0.5)	0.004
Fig.S3D
	Chemical (mV)
	wt	wt (CNQX/DAP5)	tjp1b Δ16bp / Δ16bp	tjp1b Δ16bp / Δ16bp (CNQX/DAP5)
	0.8	0.2	5.5	0.3
	1.8	0.1	1.1	0.1
	3.9	0.3	13.2	0.2
	1.8	0.2	5.7	0.1
	1.7	0.3	9.3	0.2
	0.9	0.1	7	0.1
			3.2	0.05
Avg	1.8	0.2	6.4	0.2
SEM	0.5	0.03	1.5	0.03
n	6	6	7	7
Mann Whitney test p-value <		0.004	0.02	0.002
Fig S3E	wt			gjd1a Δ8bp / Δ8bp			gjd1b Δ8bp / Δ8bp			gjd2b Δ12bp / Δ12bp			gjd2a Δ5bp / Δ5bp			tjp1a Δ2bp / Δ2bp			tjp1b Δ16bp / Δ16bp
	Amp Che (mV)	Amp Fac Chem (mV)	Ratio (a.u)	Amp Che (mV)	Amp Fac Chem (mV)	Ratio (a.u)	Amp Che (mV)	Amp Fac Chem (mV)	Ratio (a.u)	Amp Che (mV)	Amp Fac Chem (mV)	Ratio (a.u)	Amp Che (mV)	Amp Fac Chem (mV)	Ratio (a.u)	Amp Che (mV)	Amp Fac Chem (mV)	Ratio (a.u)	Amp Che (mV)	Amp Fac Chem (mV)	Ratio (a.u)
	1.7	2.7	1.58824	1.6	2.6	1.625	0.9	1.9	2.11111	0.67	1.5	2.23881	3.5	6.1	1.74286	3.6	5.1	1.41667	5.5	8.6	1.56364
	1.8	1.3	0.72222	2.7	4.1	1.51852	1	1.4	1.4	1.4	2.3	1.64286	0.3	0.6	2	2.6	3.3	1.26923	1	1.6	1.6
	0.8	1	1.25	9.1	11.3	1.24176	1.2	1.2	1	0.5	1	2	2.8	4.3	1.53571	1.2	1.7	1.41667	9.5	14.2	1.49474
	1.3	1.9	1.46154	0.6	0.6	1	1.1	1.1	1	0.8	0.5	0.625	3.8	5.1	1.34211	2.5	2.5	1	5.7	6	1.05263
	0.9	2.2	2.44444	3.1	4.4	1.41935	1.6	2.6	1.625	0.6	0.74	1.23333	1	1.3	1.3				6.3	9.6	1.52381
	1.8	2.1	1.16667	7.7	9.2	1.19481	0.6	0.7	1.16667				1.3	1.7	1.30769				5.2	6.1	1.17308
	1.8	2	1.11111	2.4	3.7	1.54167							4.4	5.2	1.18182				4.3	5.8	1.34884
	0.9	1.2	1.33333																3.2	3.6	1.125
Avg			1.38			1.36			1.38			1.5			1.5			1.3			1.4
SEM			0.2			0.1			0.2			0.3			0.1			0.1			0.1
n			8			7			6			5			7			4			8
Kruskal-Wallis ANOVA p-value						n.s.(0.89)			n.s.(0.89)			n.s.(0.89)			n.s.(0.89)			n.s.(0.89)			n.s.(0.89)
