# Supplementary material for: Electrical synaptic transmission requires a postsynaptic scaffolding protein
Source: eLife. 2021 Apr 28;10:e66898. doi: 10.7554/eLife.66898 (PMC8081524; doi:10.7554/eLife.66898)
Supplement: Figure 3—source data 1. [file elife-66898-fig3-data1.xlsx]

## Sheet: Fig3
Fig.3E	Electrical (mV)						Chemical (mV)						Fig.3I	Electrical (mV)				Chemical (mv)
	wt	gjd1a Δ8bp / Δ8bp	gjd1b Δ8bp / Δ8bp	gjd2b Δ12bp / Δ12bp	gjd2a Δ5bp / Δ5bp		wt	gjd1a Δ8bp / Δ8bp	gjd1b Δ8bp / Δ8bp	gjd2b Δ12bp / Δ12bp	gjd2a Δ5bp / Δ5bp			wt	tjp1a Δ2bp / Δ2bp	tjp1b Δ16bp / Δ16bp		wt	tjp1a Δ2bp / Δ2bp	tjp1b Δ16bp / Δ16bp
	8	0.036	14	11.8	0.4		2.4	3.6	3.4	0.6	5.9			8	8.5	0.5		2.4	4	5.5
	11.3	0.4	17.5	8.3	1		1.6	3.1	4.2	3.2	6.7			11.3	13.8	0.8		1.6	2.6	1.1
	7.2	0.25	8.7	12.1	1.2		3.6	1.6	0.9	4.6	2.8			7.2	13	1.1		3.6	5	13.2
	8	0.6	12.5	11.2	0.6		2.1	4.2	2.8	4.2	3.8			8	8	1.7		2.1	3.7	5.7
	10.5	0.3	9.5	12.6	1.3		2.3	1.6	2.5	2.3	0.9			10.5	9.5	1.8		2.3	7.1	9.3
	11.6	1.3	8.8	8.2	0.5		3.6	9.8	2.7		1.3			11.6		0.8		3.6		7
	6.6	0.7	15	12.5	0.5		4	4.7	4.7		6.2			6.6		1.1		4		4.3
	10.9	0.5	14.8				2.8	3.6	3.4					10.9		1		2.8		3.2
	11.5	0.5	13.8				3.3	1.2	1.2					11.5				3.3
	11.5	0.7	8.9				3.1	6.5						11.5				3.1
	8.6	0.6	10.6				1.7	7.8						8.6				1.7
	14.2	0.5					4.6	2.2						14.2				4.6
	15.6	0.3					1.8	0.6						15.6				1.8
	14.2	1.5					4.6	6.1						14.2				4.6
	13.7	0.6					4.9	2.5						13.7				4.9
Avg	10.9	0.6	12.2	11	0.8		3.1	3.9	2.9	3	3.9		Avg	10.9	10.6	1.1		3.1	4.5	6.2
SEM	0.7	0.1	0.9	0.7	0.1		0.3	0.7	0.4	0.7	0.9		SEM	0.7	1.2	0.2		0.3	0.8	1.3
n	15	15	11	7	7		15	15	9	5	7		n	15	5	8		15	5	8
Mann Whitney test p-value		3.2e-06	n.s. (0.27)	n.s. (0.67)	0.00024			n.s. (0.63	n.s. (0.78)	n.s. (1)	n.s. (0.5)		Mann Whitney test p-value <		n.s (0.86)	0.00012			n.s.(0.07)	0.02
