# Supplementary material for: Electrical synaptic transmission requires a postsynaptic scaffolding protein
Source: eLife. 2021 Apr 28;10:e66898. doi: 10.7554/eLife.66898 (PMC8081524; doi:10.7554/eLife.66898)
Supplement: Figure 5—source data 1. [file elife-66898-fig5-data1.xlsx]

## Sheet: Fig5
Fig.5A	Startles				Fig.5B	Startle latency				Fig.5C	Startle max. angle				Fig.5D	Startle max. angular vel.				Fig.5M	Startle to varying stimulus intensities														Fig.5N	LLC to varying stimulus intensities
		tjp1b wt sibs	tjp1b Δ16bp / Δ16bp				tjp1b wt sibs	tjp1b Δ16bp / Δ16bp			bin	tjp1b wt sibs	tjp1b Δ16bp / Δ16bp			bin	tjp1b wt sibs	tjp1b Δ16bp / Δ16bp				wt sibs						tjp1b Δ16bp / Δ16bp									wt sibs						tjp1b Δ16bp / Δ16bp
	avg. % SLC	100	88.889			time (ms) of	1	3			<30	0.636943	3.0303			<18	8.75	26.3158			dB	-8.02	0.62	5.3	10.9	17.7	25.9	-8.02	0.62	5.3	10.9	17.7	25.9			dB	-8.02	0.62	5.3	10.9	17.7	25.9	-8.02	0.62	5.3	10.9	17.7	25.9
	in 10 trials*	100	100			first move-	3	5			30-50	0.636943	4.24242			19-20	6.25	8.42105			avg. % SLC	0.111	0.1	0.4	0.667	1	1	0.1	0.1	0.3	0.7	0.778	0.8			avg. % SLC	0.222	0.111	0.25	0	0.143	0	0	0	0	0	0	0.1
	per animal	100	80			ment after	4	7			50-70	0.636943	2.42424			21-22	16.25	8.42105			in 10 trials*	0.1	0.1	0	0.3	0.778	1	0	0.333	0.9	0.8	0.778	1			in 10 trials*	0.1	0.143	0	0	0	0	0	0.1	0	0	0	0
		100	100			stimuls	2	18			70-90	2.54777	3.0303			23-24	18.75	20			per animal	0.111	0.222	0.375	0.7	0.714	1	0.1	0.111	0.2	0.2	0.333	0.9			per animal	0.2	0.111	0.4	0.111	0.111	0	0	0	0.143	0	0	0
		100	100				5	6			90-110	10.828	7.87879			25-26	15	12.6316				0.2	0.714	1	1	1	1	0	0.8	0.889	0.9	1	1				0	0	0.1	0.111	0.111	0	0	0	0	0	0.111	0
		100	100				2	4			110-130	29.2994	16.3636			27-28	16.25	11.5789				0	0	0.2	0.778	0.778	1	0	0.375	0.571	1	1	1				0	0.3	0.5	0.5	0.167	0	0	0	0	0	0	0
		100	100				4	7			130-150	28.0255	23.6364			29-30	8.75	3.15789				0	0.111	0.4	0.444	0.333	1	0	0.5	0.7	1	0.889	1				0.222	0.2	0.4	0	0.125	0.1	0	0	0	0	0	0
		90	100				4	6			150-170	17.8344	19.3939			31-32	2.5	3.15789				0.125	0.1	0.125	0.2	0.667	1	0	0	0	0	0.556	0.9				0	0.1	0.2	0.1	0.2	0	0	0	0	0	0	0
		100	100				2	6			170-190	8.28025	11.5152			33-34	1.25	1.05263				0	0	0	0.3	0.625	0.9	0	0	0.7	0.6	0.889	0.9				0.2	0.25	0.444	0.1	0	0	0	0.1	0	0	0	0
		100	100				2	7			190-210	1.27389	5.45455			35-36	1.25	2.10526				0	0	0	0.3	0.6	1	0	0.5	0.5	1	1	1				0.1	0.333	0	0	0	0	0	0.1	0	0	0	0.1
		100	90				2	4			>210	0	3.0303			>37	5	3.15789				0	0.125	0.333	0.7	1	1	0	0.5	0.7	1	1	1				0	0.2	0.1	0	0.1	0	0.111	0.1	0.1	0.4	0	0
		100	100				6	6			total	100	100			total	100	100				0.1	0.333	0.75	1	1	1	0	0.3	0.7	0.8	0.8	0.9				0.1	0.1	0.2	0	0	0	0	0	0	0	0	0
		100	100				5	13														0	0	0.1	0.556	0.5	1	0	0.1	0.7	0.5	0.9	1				0.1	0.5	0.3	0.1	0.1	0	0	0	0	0	0	0.1
		100	87.5				5	5														0	0.3	0.3	0.9	1	1	0.1	0.1	0.5	0.4	0.375	0.9				0	0	0	0.1	0	0	0	0.222	0	0.1	0.1	0
		100	100				5	5														0	0	0.1	0.6	0.7	1	0	0	0	0.2	0.4	0.7				0	0	0.2	0.2	0.2	0	0	0	0.1	0.1	0	0
		100	100				6	5														0	0.1	0.2	0.2	0.8	1	0	0.7	0.4	0.4	0.7	1				0.1	0.111	0.1	0.2	0.2	0	0	0.1	0	0.1	0	0
		100	80				6	4														0	0	0	0	0.3	0.9	0.111	0.444	0.6	0.9	0.9	1
			100				5	6														0	0	0.1	0.7	0.7	1	0.143	0.5	0.9	0.8	1	0.8
	avg.	99.4118	95.9105				6	5																				0.333	0.3	0.4	0.7	0.667	1
	stdev	2.42536	7.18934				5	8													avg.	0.0439412	0.129706	0.257824	0.549706	0.735	0.988235	0.0492778	0.314611	0.536667	0.661111	0.775833	0.933333			avg.	0.0896	0.163933	0.212933	0.101467	0.0971333	0.00666667	0.0074	0.0481333	0.0228667	0.0466667	0.0140667	0.02
	sterr	0.588235	1.69454				3	5													stdev	0.0649244	0.184037	0.276089	0.2968	0.224018	0.0332106	0.0874305	0.244868	0.277824	0.312747	0.226513	0.0907485			stdev	0.0878902	0.138277	0.166803	0.130988	0.0788678	0.0258199	0.0286601	0.0678926	0.0482595	0.10601	0.03718	0.0414039
	n	17	18				5	4													sterr	0.0157465	0.0446355	0.0669613	0.0719846	0.0543322	0.00805474	0.0206076	0.057716	0.0654837	0.0737151	0.0533896	0.0213896			sterr	0.0226931	0.0357031	0.0430684	0.0338209	0.0203636	0.00666667	0.0074	0.0175298	0.0124606	0.0273716	0.00959983	0.0106904
							5	15													n	17	17	17	17	17	17	18	18	18	18	18	18			n	15	15	15	15	15	15	15	15	15	15	15	15
	Mann Whitney test						5	2
	P value		0.0947				7	5
	Exact or approximate P value?		Exact				3	4
	P value summary		ns				5	5
	Significantly different (P < 0.05)?		No				5	4
	One- or two-tailed P value?		Two-tailed				4	6
	Sum of ranks in column A,B		341.5 , 288.5				4	5
	Mann-Whitney U		117.5				5	4
							6	5
	Difference between medians						7	5
	Median of column A		1.000, n=17				5	5
	Median of column B		1.000, n=18				3	6
	Difference: Actual		0				4	7
	Difference: Hodges-Lehmann		0				2	3
							3	7
							4	7
							2	7
							6	5
							3	5
							5	7
							1	5
							3	5
							6	4
							2	4
							2	12
							7	14
							6	14
							7	4
							5	6
							1	9
							2	8
							6	7
							2	4
							5	8
							6	7
							7	6
							4	5
							1	6
							5	6
							5	16
							7	6
							7	14
							5	17
							6	13
							6	4
							8	5
							6	15
							3	5
							5	7
							3	5
							3	3
							6	5
							6	4
							6	7
							6	6
							5	15
							5	4
							3	13
							1	4
							3	6
							5	5
							6	4
							5	6
							7	5
							4	4
							4	3
							2	3
							3	4
							2	6
							5	18
							5	6
							5	6
							3	4
							4	4
							1	5
							1	5
							6	6
							3	4
							7	5
							6	8
							4	8
							6	5
							5	4
							5	6
							4	6
							3	3
							3	5
							4	8
							4	17
							5	4
							3	12
							4	8
							2	6
							7	3
							5	14
							4	9
							4	6
							4	11
							3	12
							3	12
							4	5
							7	5
							5	5
							4	4
							4	8
							6	6
							5	5
							4	8
							4	7
							5	8
							4	4
							9	4
							6	2
							8	4
							6	15
							6	5
							2	3
							4	8
							1	7
							5	9
							7	3
							4	4
							7	5
							6	3
							5	6
							4	7
							2	4
							5	6
							6	6
							4	16
							7	6
							4	6
							7	13
								6
								3
								3
								3
								10
								15
								6
						avg.	4.46795	6.68098
						stdev	1.72054	3.58444
						sterr	0.137753	0.280755
						n	156	163
						Mann Whitney test
						P value		<0.0001
						Exact or approximate P value?		Approximate
						P value summary		****
						Significantly different (P < 0.05)?		Yes
						One- or two-tailed P value?		Two-tailed
						Sum of ranks in column A,B		20242 , 30799
						Mann-Whitney U		7996
						Difference between medians
						Median of column A		5.000, n=156
						Median of column B		6.000, n=163
						Difference: Actual		1
						Difference: Hodges-Lehmann		1
[truncated: 2 more columns]
