# Supplementary material for: Electrical synaptic transmission requires a postsynaptic scaffolding protein
Source: eLife. 2021 Apr 28;10:e66898. doi: 10.7554/eLife.66898 (PMC8081524; doi:10.7554/eLife.66898)
Supplement: Figure 7—figure supplement 1—source data 1. [file elife-66898-fig7-figsupp1-data1.xlsx]

## Sheet: Fig7--figsupp1
		Hindbrain Club Endings
		CE counts									Ordinary One-way ANOVA
	Fig. S7I		CE counts as ratio of wt control counts from same experiment					Normalized to wt>wt			ANOVA summary
											F	193.1
			wt>wt	tjp1b-/->wt	wt>tjp1b-/-			wt>wt	tjp1b-/->wt	wt>tjp1b-/-	P value	<0.0001
		avg. for animal	0.870968	0	1.01887		avg. for animal	0.994017	0	1.16281	P value summary	****
			0.677419	0	1.01887			0.773125	0	1.16281	Significant diff. among means (P < 0.05)?	Yes
			1.16129	0	1.4717			1.32536	0	1.67962	R squared	0.9279
			1	0	1.13208			1.14128	0	1.29201
			0.9	0	1.01887			1.02715	0	1.16281	Brown-Forsythe test
			0.6	0	0.90566			0.684768	0	1.03361	F (DFn, DFd)	16.80 (2, 30)
			0.7	0	1.24528			0.798896	0	1.42122	P value	<0.0001
			1.1	0	1.58491			1.25541	0	1.80882	P value summary	****
				0	1.35849				0	1.55042	Are SDs significantly different (P < 0.05)?	Yes
				0					0
				0					0		ANOVA table	SS	DF	MS	F (DFn, DFd)	P value
				0					0		Treatment (between columns)	12.28	2	6.142	F (2, 30) = 193.1	P<0.0001
				0					0		Residual (within columns)	0.9544	30	0.03181
				0					0		Total	13.24	32
				0					0
				0					0		Data summary
											Number of treatments (columns)	3
											Number of values (total)	33
		avg.	0.87621	0	1.19497		avg.	1	0	1.36379
		stdev	0.204984	0	0.234145		stdev	0.233944	0	0.267225	Bonferroni's multiple comparisons test	Mean Diff.	95.00% CI of diff.	Significant?	Summary	Adjusted P Value
		sterr	0.0724729	0	0.0780483		sterr	0.0955074	0	0.109094	wt>wt vs. tjp1b-/->wt	1	0.8178 to 1.182	Yes	****	<0.0001
		n	8	16	9		n	8	16	9	wt>wt vs. wt>tjp1b-/-	-0.3638	-0.5683 to -0.1593	Yes	***	0.0004
		Spinal Cord M/CoLo Synapses
		M/CoLo Synapse counts									Ordinary One-way ANOVA
	Fig. S7J		M/CoLo synapse counts per spinal cord hemisegment					Normalized to wt>wt			ANOVA summary
											F	632.1
			wt>wt	tjp1b-/->wt	wt>tjp1b-/-			wt>wt	tjp1b-/->wt	wt>tjp1b-/-	P value	<0.0001
		avg. for animal	1	1	0		avg. for animal	0.969163	0.969163	0	P value summary	****
			1	1	0			0.969163	0.969163	0	Significant diff. among means (P < 0.05)?	Yes
			1	1.22222	0			0.969163	1.18453	0	R squared	0.9731
			1.1	1	0			1.06608	0.969163	0
			1	1.16667	0			0.969163	1.13069	0	Brown-Forsythe test
			1.125	1	0			1.09031	0.969163	0	F (DFn, DFd)	2.141 (2, 35)
			1	1	0			0.969163	0.969163	0	P value	0.1326
			1.25	1	0			1.21145	0.969163	0	P value summary	ns
			1	1.11111	0			0.969163	1.07685	0	Are SDs significantly different (P < 0.05)?	No
			0.875	1.11111				0.848018	1.07685
			1	1				0.969163	0.969163		ANOVA table	SS	DF	MS	F (DFn, DFd)	P value
				1.11111					1.07685		Treatment (between columns)	6.944	2	3.472	F (2, 35) = 632.1	P<0.0001
				1					0.969163		Residual (within columns)	0.1922	35	0.005493
				1					0.969163		Total	7.136	37
				0.888889					0.861478
				1.125					1.09031		Data summary
				1					0.969163		Number of treatments (columns)	3
				1					0.969163		Number of values (total)	38
		avg.	1.03182	1.0409	0		avg.	1	1.0088	0
		stdev	0.096236	0.0811914	0		stdev	0.0932683	0.0786877	0	Bonferroni's multiple comparisons test	Mean Diff.	95.00% CI of diff.	Significant?	Summary	Adjusted P Value
		sterr	0.0290162	0.019137	0		sterr	0.0380766	0.0321241	0	wt>wt vs. tjp1b-/->wt	-0.008797	-0.07522 to 0.05763	No	ns	>0.9999
		n	11	18	9		n	11	18	9	wt>wt vs. wt>tjp1b-/-	1	0.9220 to 1.078	Yes	****	<0.0001
